# Supplementary material for: Electrodeposition of hydrated vanadium pentoxide on nanoporous carbon cloth for hybrid energy storage
Source: Royal Society of Chemistry journal article supplement (doi:10.1039/c7se00559h), 2018-01-01
Supplement: c7se00559h1.pdf [file c7se00559h1.pdf]

## Supplementary Information

# **Electrodeposition of hydrated vanadium pentoxide on nanoporous carbon cloth for hybrid energy storage**

Juhan Lee,<sup>a,b</sup> Sylvain Badie,<sup>a,b</sup> Pattarachai Srimuk,<sup>a,b</sup> Alexander Ridder,<sup>a,b</sup>  
Hwirim Shim,<sup>a,b</sup> Soumyadip Choudhury,<sup>a</sup> Yoon-Chae Nah,<sup>c</sup> Volker Presser<sup>a,b,\*</sup>

<sup>a</sup> INM – Leibniz Institute for New Materials, Campus D2 2, 66123 Saarbrücken, Germany

<sup>b</sup> Department of Materials Science and Engineering, Saarland University, Campus D2 2, 66123 Saarbrücken, Germany

<sup>c</sup> School of Energy, Materials and Chemical Engineering, Korea University of Technology and Education, Chungjeol-ro 1600, 31253 Cheonan, Republic of Korea

\* Corresponding author's eMail: [volker.presser@leibniz-inm.de](mailto:volker.presser@leibniz-inm.de)

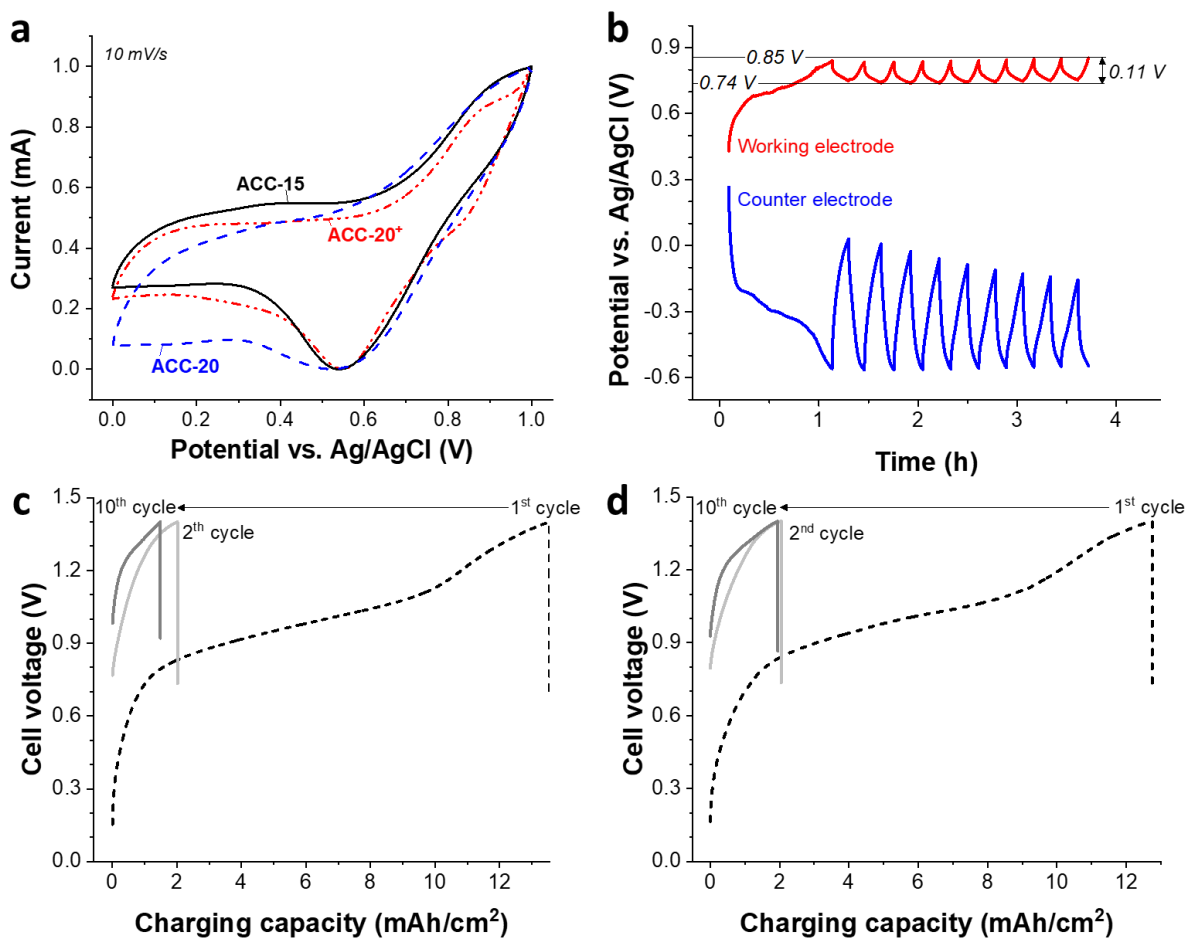

**Figure S1:** (a) Cyclic voltammogram of ACC electrodes in 3 M VOSO<sub>4</sub> aqueous solution (pH=1.8). Galvanostatic charge/discharge cycles are applied for the electrodeposition of vanadium oxides with ACC-20<sup>+</sup> (b). (c) ACC-20 in 3 M VOSO<sub>4</sub> at 20 mA/cm<sup>2</sup> for ten cycles with a resting time of 10 min between each cycle. (d) ACC-15 in 3 M VOSO<sub>4</sub> at 20 mA/cm<sup>2</sup> for ten cycles with a resting time of 10 min between each cycle.

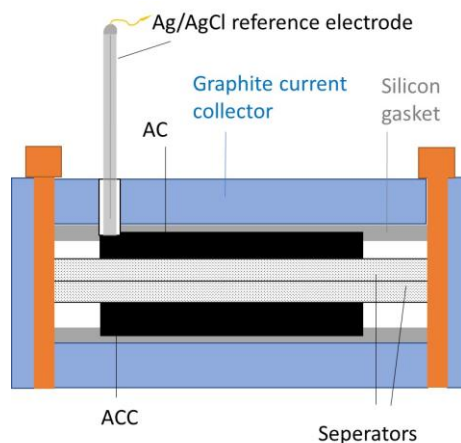

**Figure S2:** Schematic design of the cell used for the electrodeposition process.

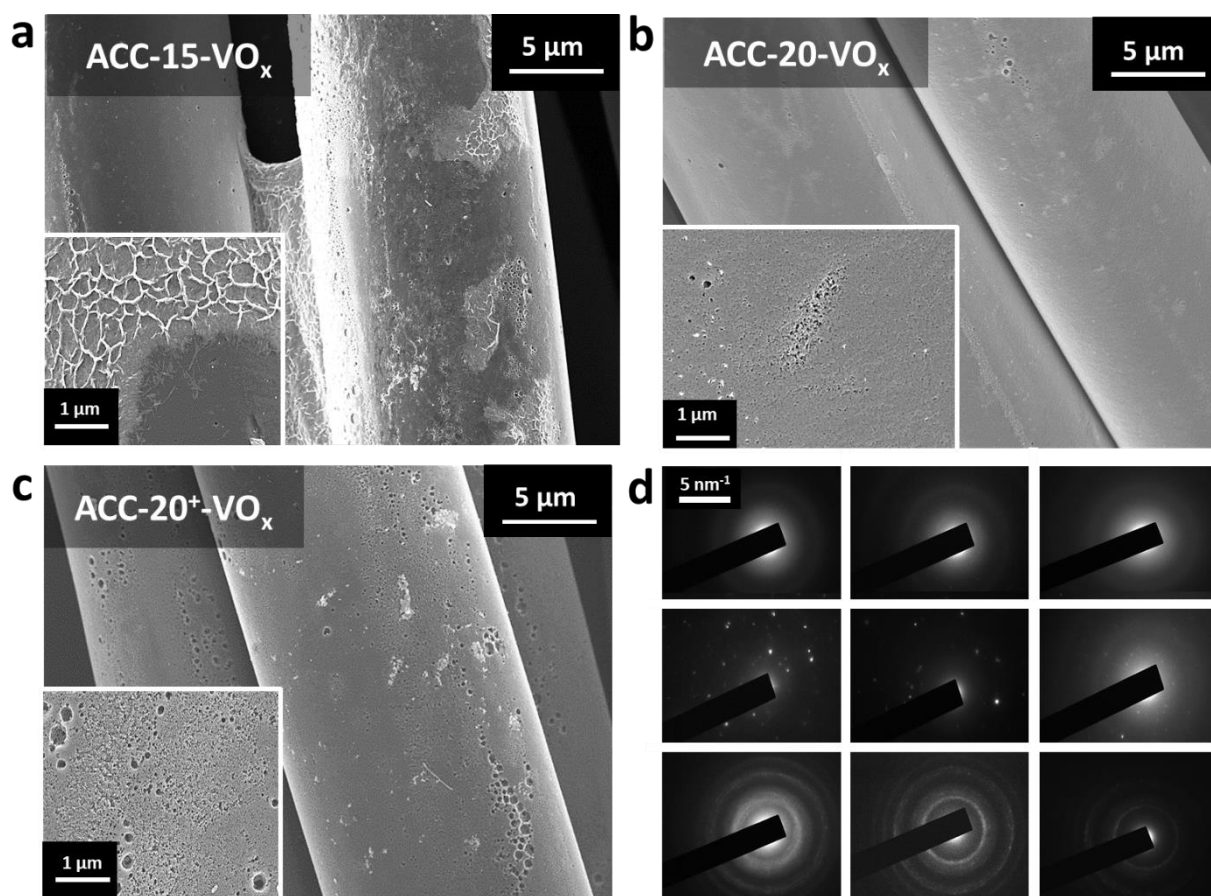

**Figure S3:** Scanning electron micrographs (a-c) of the electrodeposited ACC electrodes. (d) Selected area electron diffractograms of ACC-15-VO<sub>x</sub> from nine different positions to provide a first step towards a statistical approach.

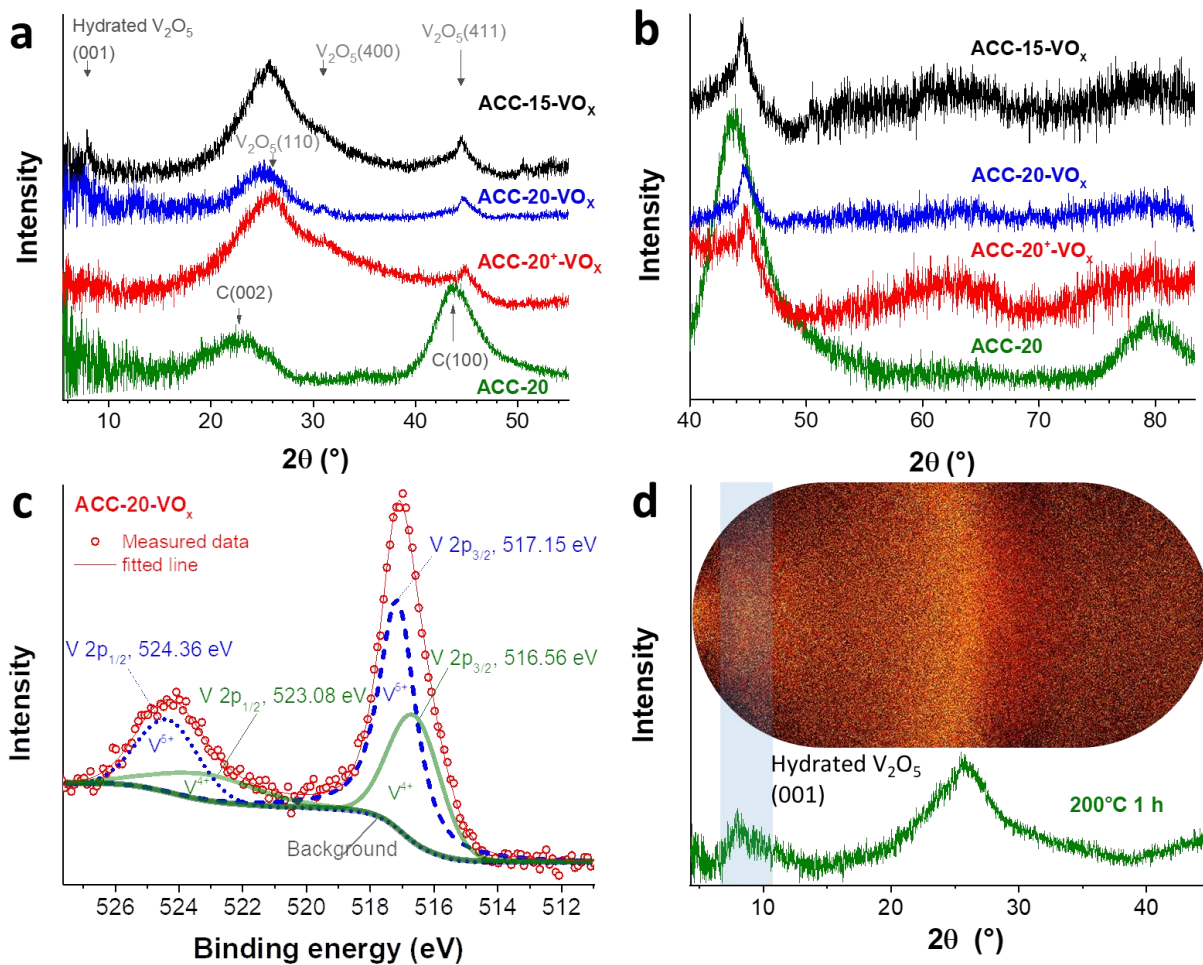

**Figure S4:** X-ray diffractogram of ACC-20 electrode, electrodeposited ACC electrodes (a) at 5.5-55.0°  $2\theta$ , and (b) at 40.0-83.0°  $2\theta$ , and ACC-20<sup>+</sup>-VO<sub>x</sub> electrode after annealing at 200 °C for 1 h (d). The inset shows the diffraction image from the X-ray detector plate. The reflexes for vanadium pentoxide (V<sub>2</sub>O<sub>5</sub>) in the X-ray diffractograms are identified according to PDF 41-1426 while the reflex for hydrated V<sub>2</sub>O<sub>5</sub> was identified based on Ref. <sup>1</sup>. (c) X-ray photoelectron spectrum of ACC-20-VO<sub>x</sub>.

**Table S1:** Specific resistivity of the ACC electrodes. Data for the AC (YP-80F, Kuraray) electrode serves for comparison and was measured on a polymer binder consolidated activated carbon electrode (5 mass% PTFE).

|                                                 | ACC-15          | ACC-20          | ACC-20 <sup>+</sup> | YP-80F         |
|-------------------------------------------------|-----------------|-----------------|---------------------|----------------|
| Specific resistivity ( $\Omega\cdot\text{cm}$ ) | 0.25 $\pm$ 0.01 | 1.35 $\pm$ 0.05 | 0.9 $\pm$ 0.1       | 11.5 $\pm$ 0.5 |

**Table S2:** The parameters used for the fitting of XPS data are summarized. The parameter L/G indicates the percentage of Lorentzian relative to Gaussian shape.

| Position (eV) | Assignment         | FWHM (eV) | Area  | L/G (%) |
|---------------|--------------------|-----------|-------|---------|
| 516.56        | V2p <sub>3/2</sub> | 1.88      | 0.303 | 0       |
| 517.15        | V2p <sub>3/2</sub> | 1.36      | 0.533 | 74      |
| 523.08        | V2p <sub>1/2</sub> | 3.73      | 0.135 | 19      |
| 524.36        | V2p <sub>1/2</sub> | 2.26      | 0.210 | 0       |

#### References:

1. Q. Wei, J. Liu, W. Feng, J. Sheng, X. Tian, L. He, Q. An and L. Mai, *Journal of Materials Chemistry A*, 2015, **3**, 8070-8075.
